# Supplementary material for: Comparison between Prehospital Mechanical Cardiopulmonary Resuscitation (CPR) Devices and Manual CPR for Out-of-Hospital Cardiac Arrest: A Systematic Review, Meta-Analysis, and Trial Sequential Analysis
Source: MDPI journal article supplement (doi:10.3390/jcm11051448), 2022-03-07

**Supplementary Table S1. The used search term in the databases**

| Library            | Search term                                                                                                                                                                                                                                                                                     | Restriction |
|--------------------|-------------------------------------------------------------------------------------------------------------------------------------------------------------------------------------------------------------------------------------------------------------------------------------------------|-------------|
| Pubmed             | ("Heart arrest"[All Fields] OR "cardiac arrest"[All Fields]) AND ("cardiopulmonary resuscitation"[All Fields] OR "CPR"[All Fields] OR "chest compression"[All Fields]) AND ("Mechanical"[All Fields] OR "LUCAS"[All Fields] OR "AutoPulse"[All Fields] OR "Load distributing band"[All Fields]) | All Fields  |
| Cochrane Library   | ("Heart arrest" OR "cardiac arrest") AND ("cardiopulmonary resuscitation" OR "CPR" OR "chest compression") AND ("Mechanical" OR "LUCAS" OR "AutoPulse" OR "Load distributing band") (Word variations have been searched)                                                                        | All Text    |
| Embase             | #1. 'heart arrest' OR 'cardiac arrest'<br>#2. 'cpr' OR 'cardiopulmonary resuscitation' OR 'chest compression'<br>#3. 'lucas' OR 'autopulse' OR 'mechanical' OR 'load distributing band'<br>#4. #1 AND #2 AND #3                                                                                 | No          |
| ClinicalTrials.gov | "Heart arrest" OR "Cardiac arrest"   ("Cardiopulmonary resuscitation" OR "CPR" OR "Chest compression") AND ("LUCAS" OR "Autopulse" OR "Load distributing band" OR "Mechanical")                                                                                                                 | No          |

**Supplementary Table S2. Summary of the Cochrane risk-of-bias tool for randomised trials (RoB 2.0)**

| Type of RCT      | Study             | D1            | D1b  | D2  | D3  | D4  | D5  | Overall       |
|------------------|-------------------|---------------|------|-----|-----|-----|-----|---------------|
| Cluster RCT      | Anantharaman 2017 | Some concerns | Low  | Low | Low | Low | Low | Some concerns |
|                  | Gao 2016          | High          | High | Low | Low | Low | Low | High          |
|                  | Hallstrom 2006    | Some concerns | Low  | Low | Low | Low | Low | Some concerns |
|                  | Perkins 2015      | Low           | Low  | Low | Low | Low | Low | Low           |
| Individually RCT | Rubertsson 2014   | Low           |      | Low | Low | Low | Low | Low           |
|                  | Smekal 2011       | Low           |      | Low | Low | Low | Low | Low           |
|                  | Wik 2014          | Low           |      | Low | Low | Low | Low | Low           |

D1: Risk of bias arising from the randomisation process.

D1b: Risk of bias arising from the timing of identification or recruitment of participants in a cluster-randomised trial.

D2: Risk of bias due to deviations from the intended interventions.

D3: Risk of bias due to missing outcome data.

D4: Risk of bias in measurement of the outcome

D5: Risk of bias in selection of the reported result

RCT: Randomised controlled trial

**Supplementary Table S3. Summary of The Risk Of Bias In Non-randomised Studies – of Interventions (ROBINS-I) assessment**

| Study            | D1       | D2                | D3  | D4                | D5                | D6  | D7  | Overall  |
|------------------|----------|-------------------|-----|-------------------|-------------------|-----|-----|----------|
| Axelsson 2006    | Moderate | Low               | Low | Low               | Low               | Low | Low | Moderate |
| Axelsson 2013    | Moderate | Low               | Low | Low               | Low               | Low | Low | Moderate |
| Casner 2005      | Serious  | Low               | Low | Low               | Low               | Low | Low | Serious  |
| Chen 2021        | Moderate | Low               | Low | Low               | Low               | Low | Low | Moderate |
| Jennings 2012    | Moderate | Low               | Low | Low               | Low               | Low | Low | Moderate |
| Jung 2019        | Moderate | Low               | Low | Low               | Low               | Low | Low | Moderate |
| Maule 2007       | Serious  | No<br>information | Low | No<br>information | No<br>information | Low | Low | Serious  |
| Newberry 2018    | Moderate | Low               | Low | Low               | Low               | Low | Low | Moderate |
| Ong 2006         | Moderate | Low               | Low | Low               | Low               | Low | Low | Moderate |
| Satterlee 2013   | Serious  | Low               | Low | Low               | Low               | Low | Low | Serious  |
| Savastano 2019   | Moderate | Low               | Low | Low               | Low               | Low | Low | Moderate |
| Schmidbauer 2017 | Moderate | Low               | Low | Low               | Low               | Low | Low | Moderate |
| Seewald 2019     | Moderate | Low               | Low | Low               | Low               | Low | Low | Moderate |
| Ujvárosy 2018    | Serious  | Low               | Low | Low               | Low               | Low | Low | Serious  |
| Zeiner 2015      | Serious  | Low               | Low | Low               | Low               | Low | Low | Serious  |

- 
- D1: Bias due to confounding
  - D2: Bias in selection of participants into the study
  - D3: Bias in classification of interventions
  - D4: Bias due to deviations from intended interventions
  - D5: Bias due to missing data
  - D6: Bias in measurement of outcomes
  - D7: Bias in selection of the reported result

**Supplementary Table S4. Sensitivity analyses of pooled odds ratios of primary and secondary survival outcomes of OHCA**

|                          | ROSC              |                       |          |                           | Survival to hospital admission |                       |          |                           | Survival to discharge |                       |          |                           | Survival to discharge with favourable neurologic status |                       |          |                           |
|--------------------------|-------------------|-----------------------|----------|---------------------------|--------------------------------|-----------------------|----------|---------------------------|-----------------------|-----------------------|----------|---------------------------|---------------------------------------------------------|-----------------------|----------|---------------------------|
|                          | No. of<br>Studies | Pooled OR<br>(95% CI) | <i>P</i> | <i>I</i> <sup>2</sup> (%) | No. of<br>Studies              | Pooled OR<br>(95% CI) | <i>P</i> | <i>I</i> <sup>2</sup> (%) | No. of<br>Studies     | Pooled OR<br>(95% CI) | <i>P</i> | <i>I</i> <sup>2</sup> (%) | No. of<br>Studies                                       | Pooled OR<br>(95% CI) | <i>P</i> | <i>I</i> <sup>2</sup> (%) |
| <b>Random effect</b>     | 18                | 1.32 (1.11 – 1.58)    | 0.002    | 88%                       | 16                             | 1.23 (1.04 – 1.47)    | 0.02     | 84%                       | 16                    | 0.87 (0.71 – 1.06)    | 0.17     | 78%                       | 10                                                      | 0.82 (0.64 – 1.07)    | 0.14     | 68%                       |
| <b>Fixed effect</b>      | 18                | 1.13 (1.07 – 1.20)    | <0.001   | 88%                       | 16                             | 1.08 (1.02 – 1.14)    | 0.01     | 84%                       | 16                    | 0.82 (0.76 – 0.89)    | <0.001   | 78%                       | 10                                                      | 0.80 (0.71 – 0.91)    | <0.001   | 68%                       |
| <b>Study design</b>      |                   |                       |          |                           |                                |                       |          |                           |                       |                       |          |                           |                                                         |                       |          |                           |
| RCT                      | 7                 | 1.04 (0.90 – 1.20)    | 0.61     | 61%                       | 6                              | 1.00 (0.86 – 1.16)    | 0.99     | 55%                       | 7                     | 0.91 (0.75 – 1.10)    | 0.32     | 38%                       | 5                                                       | 0.81 (0.61 – 1.08)    | 0.15     | 60%                       |
| non-RCT                  | 11                | 1.48 (1.12 – 1.97)    | 0.006    | 89%                       | 10                             | 1.35 (1.03 – 1.76)    | 0.03     | 85%                       | 9                     | 0.83 (0.59 – 1.16)    | 0.26     | 86%                       | 5                                                       | 0.91 (0.54 – 1.52)    | 0.71     | 78%                       |
| <b>Low risk of bias*</b> | 10                | 1.30 (1.04 – 1.63)    | 0.02     | 91%                       | 12                             | 1.20 (0.99 – 1.46)    | 0.07     | 88%                       | 12                    | 0.87 (0.69 – 1.08)    | 0.21     | 81%                       | 7                                                       | 0.91 (0.70 – 1.18)    | 0.47     | 66%                       |

RCT: randomized-control trials, OR: odds ratio, OHCA: out-of-hospital cardiac arrest, ROSC: return of spontaneous circulation

\*Low risk of bias studies included RCTs with low overall risk of bias evaluated by ROB2.0 and non-RCTs with moderate risk of bias evaluated by ROBINS-1

**Supplementary Figure S1.** Funnel plots of (A) Return of spontaneous circulation, (B) Survival to hospital admission, (C) Survival to discharge, and (D) Survival to discharge with favorable neurologic status. OR, odds ratio; RCT, randomised controlled trial; Non-RCT, non-randomised controlled trial.

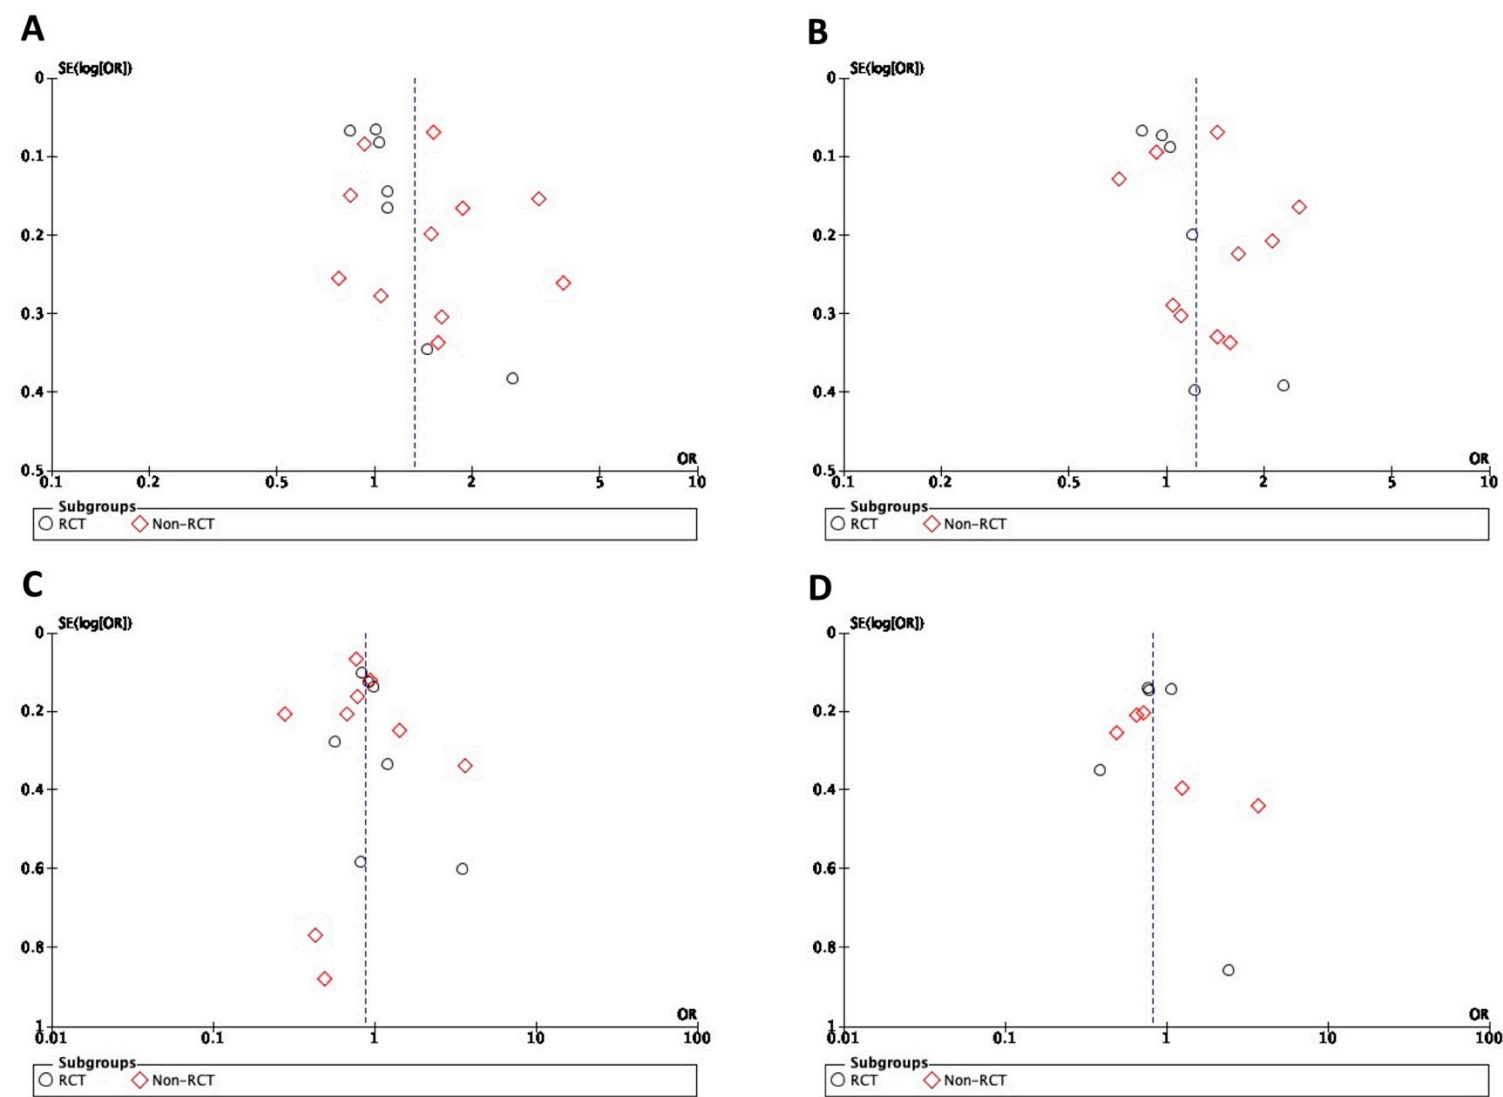

Supplement: s1 [file s1]
